# Supplementary material for: Chemiluminescent probes for imaging H2S in living animals
Source: PubMed Central journal article supplement (PMC4335805; doi:10.1039/c4sc03516j), 2015-01-02

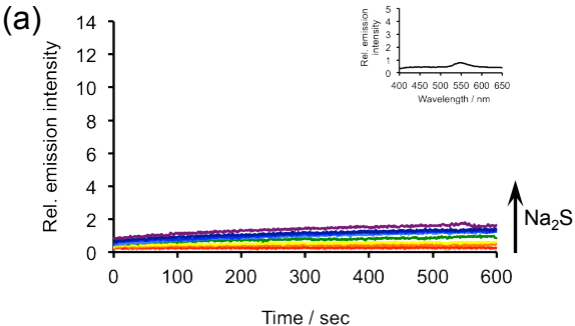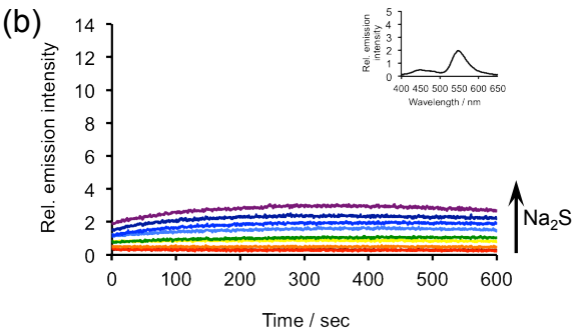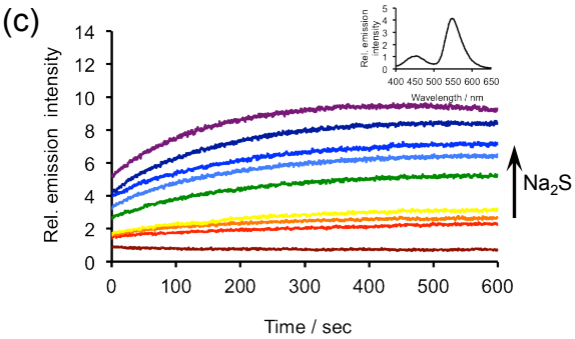

Supplement: NIHMS657072-supplement-Figure_1.pdf [file NIHMS657072-supplement-Figure_1.pdf]
